# Supplementary material for: Combined administration of testosterone plus an ornithine decarboxylase inhibitor as a selective prostate-sparing anabolic therapy
Source: PubMed Central journal article supplement (PMC4331775; doi:10.1111/acel.12174), 2013-12-04
Supplement: acel0013-0303-sd1.pdf [file acel0013-0303-sd1.pdf]

# Supplemental Figure SF1. Comparison of pathway expression for the prostate on a subnetwork centered on the Gene Ontology (GO) term, “polyamine biosynthetic process.”

Prostate  
Cx/Sham

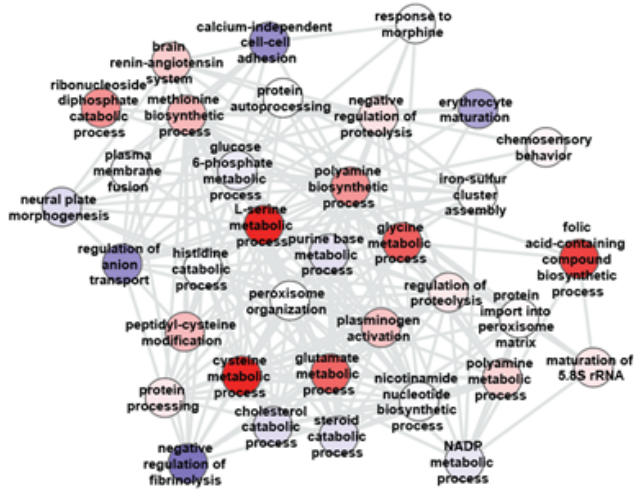

log- fold  
change

0.25

Prostate  
Tes/Cx

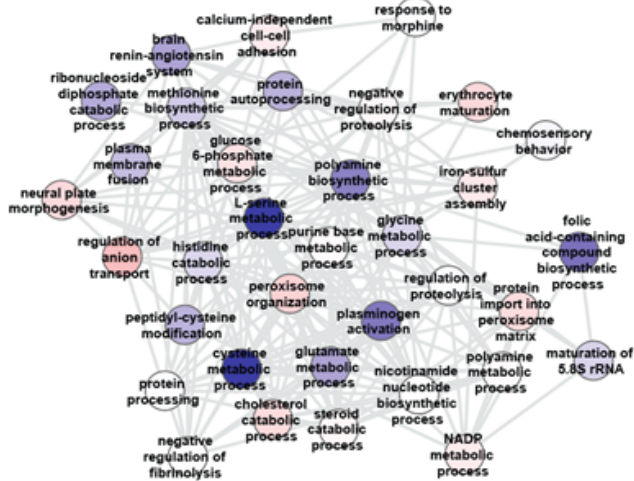

-0.25

Prostate  
Fst/Cx

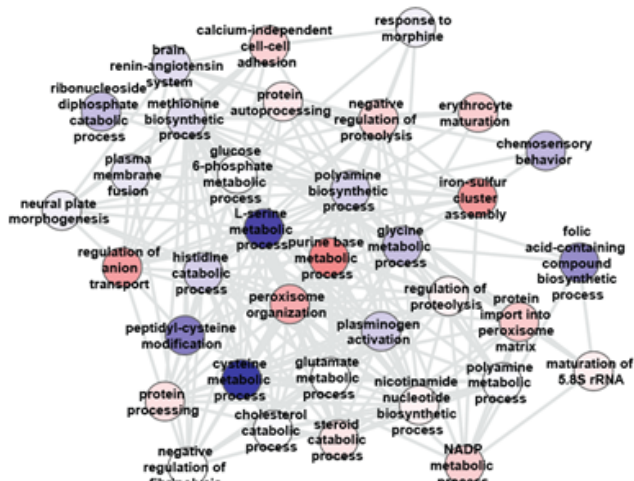

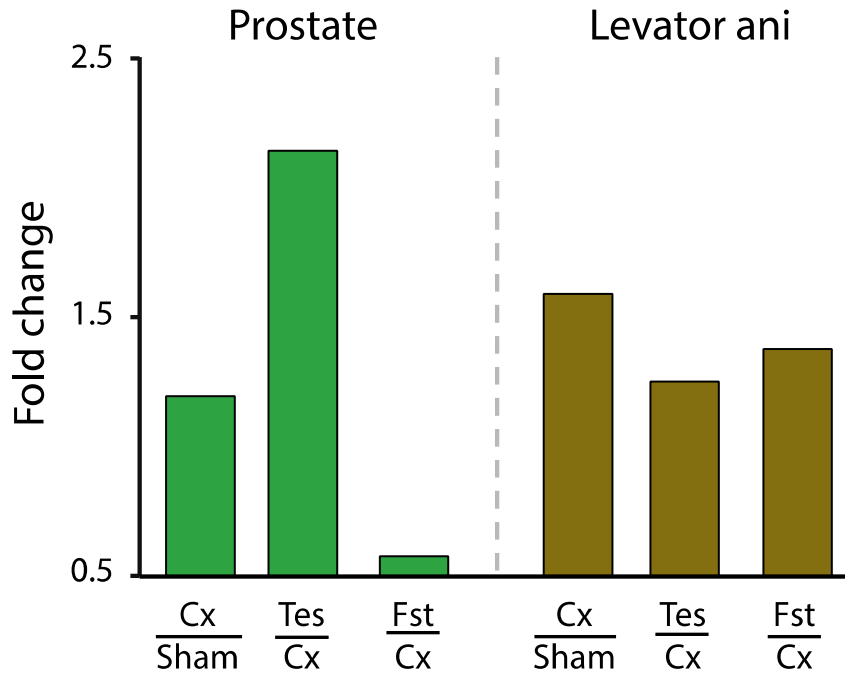

**Figure S2. Differential regulation of Odc1 mRNA expression in prostate tissues obtained from castrated mice after testosterone and Fst treatments.** qPCR analysis of the mRNA confirms that testosterone supplementation upregulates Odc1 while rFst treatment does not effect the expression in prostate.

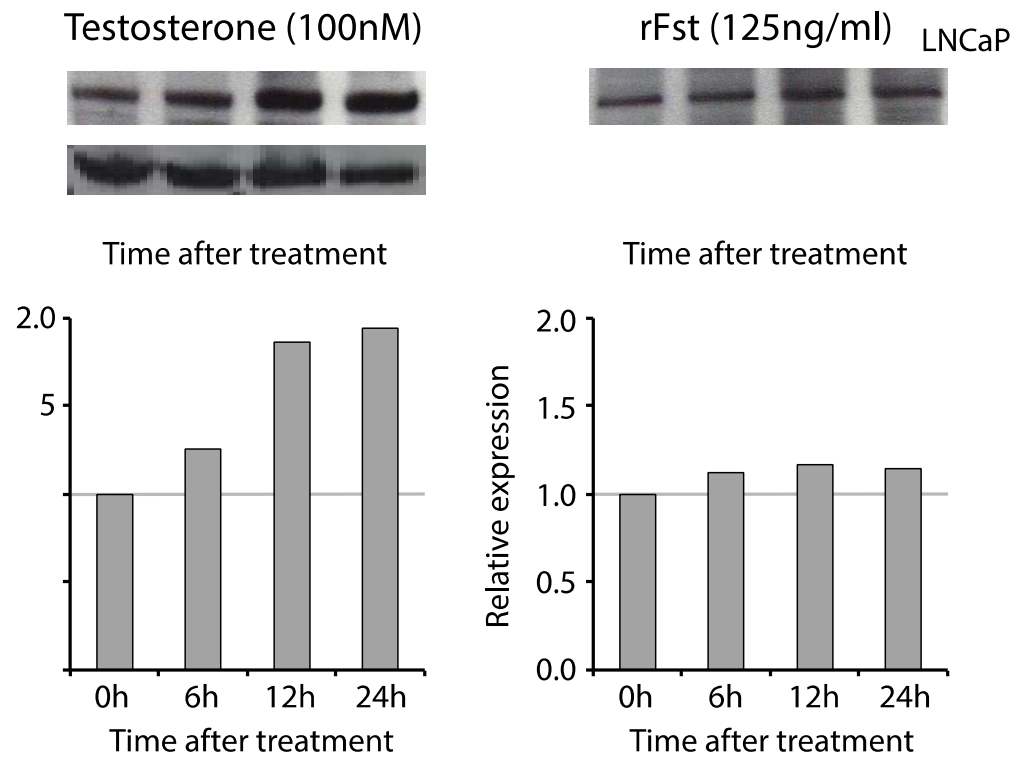

**Figure S3: Recombinant Fst does not affect Odc1 protein expression in LnCaP cells.** LnCap cell were treated with either testosterone (100 nM) or rFst (125 ng/mL) and the lysates were probed for Odc1 expression at the depicted time points. The immublots confirm the selective induction of Odc1 expression by testosterone *in vitro*.

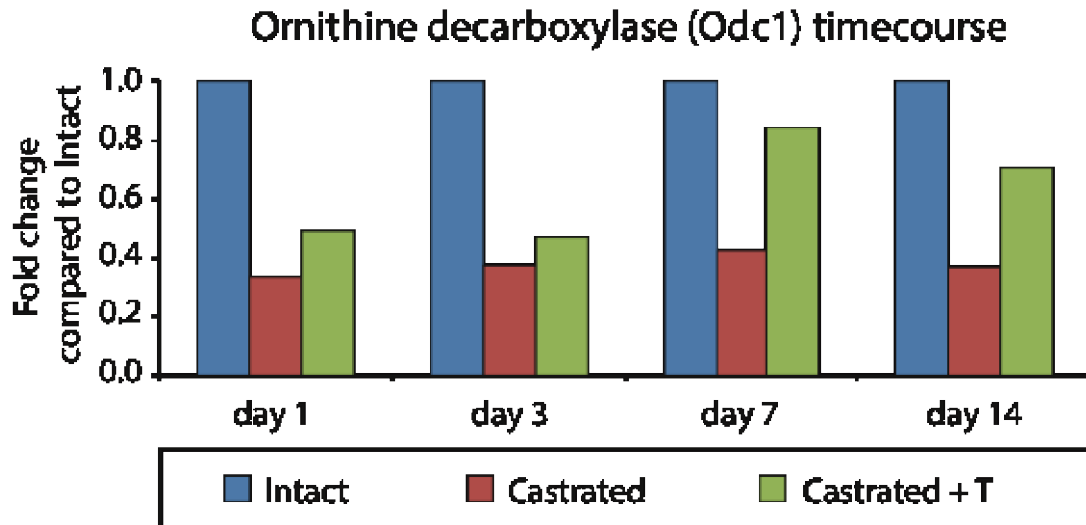

**Figure S4: Odc1 expression is consistently upregulated by testosterone supplementation in castrated mice in-vivo.** qPCR analysis of relative Odc1 mRNA expression in prostate tissues obtained from different treatment groups shows a time dependent increase in expression.

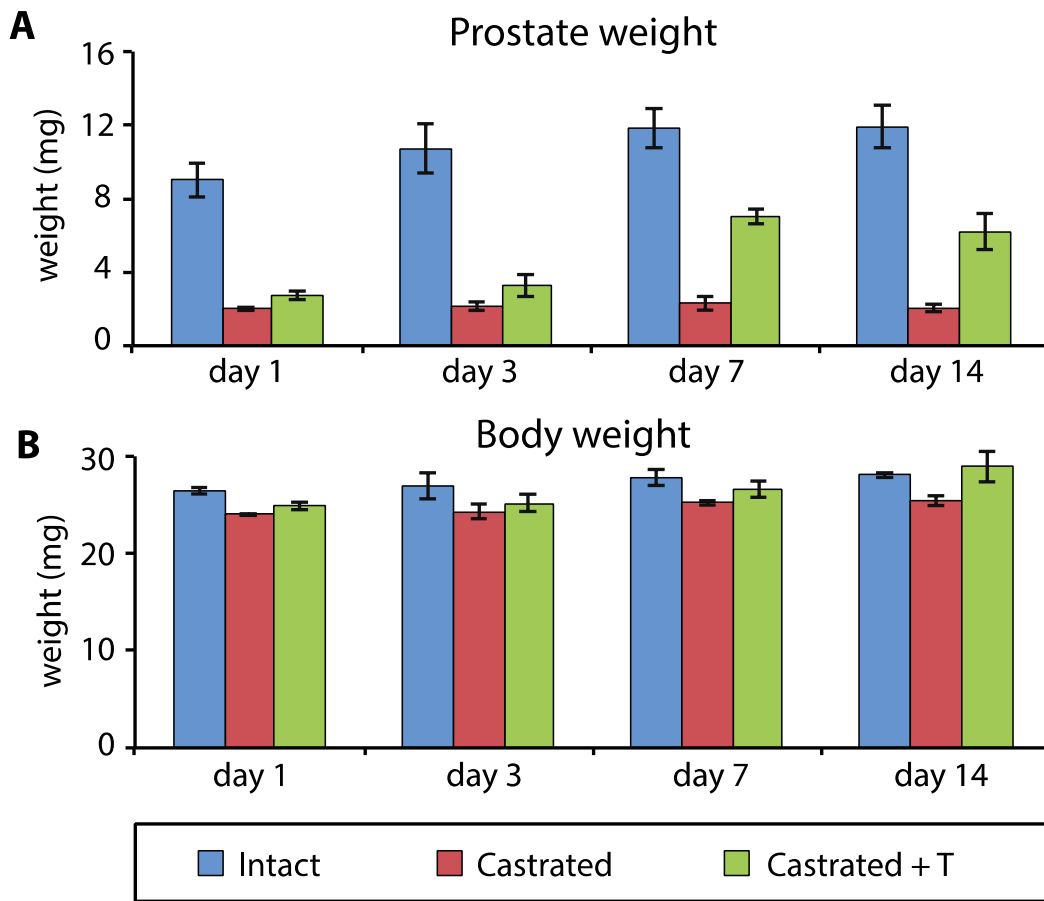

**Figure S5. Effect of castration and testosterone supplementation on prostate weights in mice.** Panel A shows the time-course of recovery of prostate weights in castrate mice upon testosterone administration. Panel B shows the corresponding body weights of animals in treatment groups.
